# Supplementary material for: Constructing Interconnected Microporous Structures in Carbon by Homogeneous Activation as a Sustainable Electrode Material for High-Performance Supercapacitors
Source: MDPI journal article supplement (doi:10.3390/molecules28196851), 2023-09-28
Supplement: s1 [file s1]

## Supporting information

### Constructing interconnected microporous structure in carbon by homogeneous activation as a sustainable electrode material for high-performance supercapacitors

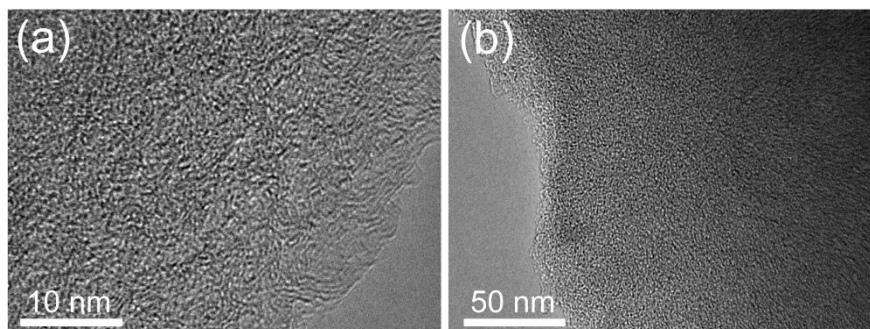

Figure S1. TEM images of XYC-2

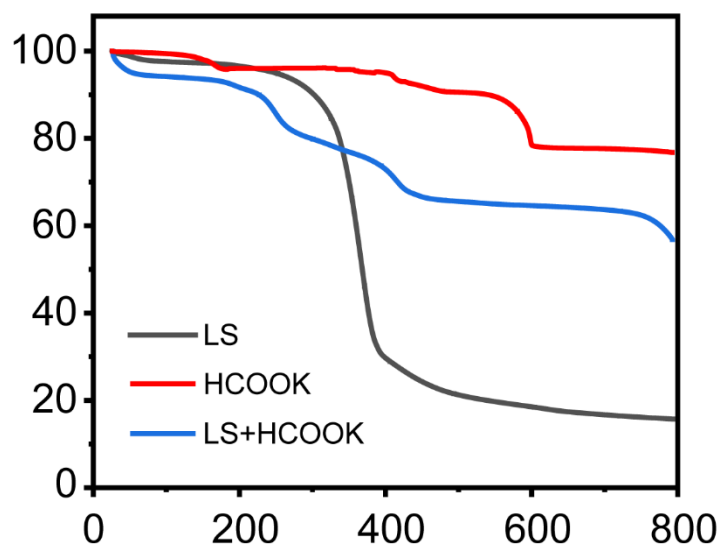

Figure S2. (a) TG curves of different samples

**Table S1. Pore structure parameters of as-obtained samples.**

| sample | SSA (m <sup>2</sup> g <sup>-1</sup> ) |                    |                                      | Pore volume (cm <sup>3</sup> g <sup>-1</sup> ) |                    |                        |
|--------|---------------------------------------|--------------------|--------------------------------------|------------------------------------------------|--------------------|------------------------|
|        | S <sub>BET</sub>                      | S <sub>micro</sub> | S <sub>micro</sub> /S <sub>BET</sub> | V <sub>total</sub>                             | V <sub>Micro</sub> | D <sub>aver</sub> (nm) |
| XYC-1  | 1619                                  | 1366               | 0.84                                 | 0.66                                           | 0.53               | 1.66                   |
| XYC-2  | 1834                                  | 1480               | 0.81                                 | 0.86                                           | 0.59               | 1.71                   |
| XYC-3  | 1802                                  | 1383               | 0.77                                 | 0.68                                           | 0.56               | 1.75                   |

S<sub>BET</sub>: The specific surface area calculated by BET method;

S<sub>micro</sub>: t-Plot Micropore Area;

V<sub>total</sub>: Single point adsorption total pore volume at P/P<sub>o</sub> = 0.995;

V<sub>micro</sub>: t-Plot Micropore Area;

D<sub>aver</sub>: Average pore width calculated by 4V<sub>total</sub>/S<sub>BET</sub>.

**Table S2. Surface chemical compositions of the prepared samples**

| Sample | C     | O     | O-I   | O-II  | O-III |
|--------|-------|-------|-------|-------|-------|
|        | (at%) | (at%) | (at%) | (at%) | (at%) |
| XYC-1  | 87.98 | 10.42 | 3.25  | 4.51  | 2.66  |
| XYC-2  | 88.97 | 9.28  | 5.48  | 2.31  | 1.49  |
| XYC-3  | 88.26 | 9.91  | 2.91  | 4.55  | 2.45  |
